# Supplementary material for: Effects of Txk-mediated activation of NF-κB signaling pathway on neurological deficit and oxidative stress after ischemia-reperfusion in rats
Source: PubMed Central journal article supplement — Mol Med Rep. 2021 May 21;24(1):524. doi: 10.3892/mmr.2021.12163 (PMC8160475; doi:10.3892/mmr.2021.12163), 2021-05-21

Figure S1. (A) Western blot analysis and (B) quantification of Txk expression in MCAO, sh-Txk-1201, sh-Txk-1442, sh-Txk-1746 and negative control groups *in vivo*. Protein levels were normalized to  $\beta$ -actin. \* $P < 0.05$ , sh-Txk-1201 vs. others;  $n = 3$  per group. Data were represented as mean  $\pm$  standard error. Txk, Txk tyrosine kinase; MCAO, middle cerebral artery occlusion; sh, short hairpin RNA.

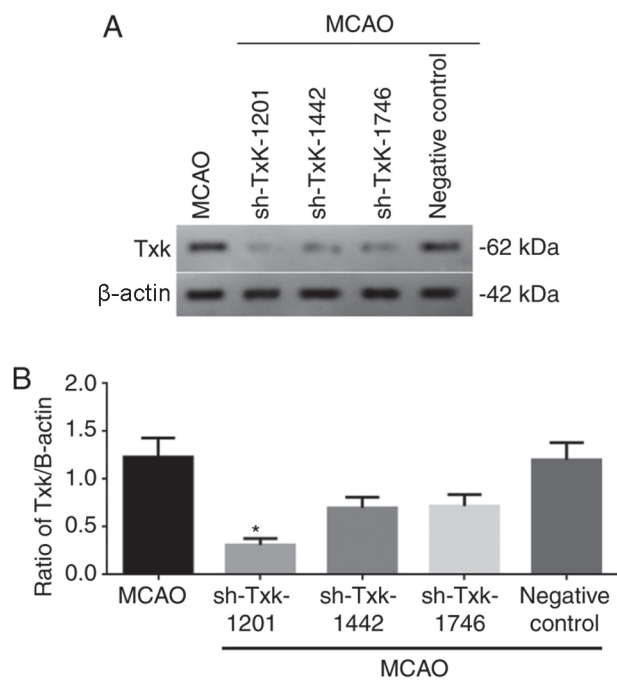

Supplement: Supplementary_Data.pdf [file Supplementary_Data.pdf]
